# Supplementary material
Source: PubMed Central journal article supplement (PMC6490178)
Supplement: NIHMS1021612-supplement-Supp.pdf [file NIHMS1021612-supplement-Supp.pdf]

## Supplementary Online Content

Shehab N, Lovegrove MC, Geller AI, Rose KO, Weidle NJ, Budnitz DS. US emergency department visits for outpatient adverse drug events, 2013-2014. *JAMA*. doi:10.1001/jama.2016.16201

**eTable 1.** US Emergency Department (ED) Visits for Adverse Drug Events (ADEs) by Patient Age and Year, 2005-2014

**eTable 2.** US Population Rates of Emergency Department (ED) Visits for Adverse Drug Events (ADEs) by Patient Age and Year, 2005-2014

**eTable 3.** US Emergency Department (ED) Visits for Adverse Drug Events (ADEs) from Commonly Implicated Drug Classes by Year, 2005-2014

**eFigure.** US Emergency Department (ED) Visits for Adverse Drug Events (ADEs) from Commonly Implicated Drug Classes by Patient Age, 2013-2014

This supplementary material has been provided by the authors to give readers additional information about their work.

**eTable 1. US Emergency Department (ED) Visits for Adverse Drug Events (ADEs) by Patient Age and Year, 2005-2014<sup>a</sup>**

| Patient age group, y | 2005-2006    |                                            | 2007-2008 <sup>c</sup> |                                            | 2009-2010 <sup>c</sup> |                                            | 2011-2012    |                                            | 2013-2014 <sup>c</sup> |                                            |
|----------------------|--------------|--------------------------------------------|------------------------|--------------------------------------------|------------------------|--------------------------------------------|--------------|--------------------------------------------|------------------------|--------------------------------------------|
|                      | No. of Cases | National Estimate, % (95% CI) <sup>b</sup> | No. of Cases           | National Estimate, % (95% CI) <sup>b</sup> | No. of Cases           | National Estimate, % (95% CI) <sup>b</sup> | No. of Cases | National Estimate, % (95% CI) <sup>b</sup> | No. of Cases           | National Estimate, % (95% CI) <sup>b</sup> |
| ≤5                   | 4,581        | 14.6 (12.4-16.8)                           | 5,382                  | 13.1 (11.2-15.1)                           | 6,017                  | 12.8 (10.9-14.6)                           | 5,982        | 11.0 (9.2-12.9)                            | 5,133                  | 9.7 (7.7-11.6)                             |
| 6-19                 | 2,652        | 8.9 (7.8-10.2)                             | 3,114                  | 8.2 (7.2-9.3)                              | 3,550                  | 8.0 (7.1-8.9)                              | 3,933        | 7.9 (6.9-8.9)                              | 3,452                  | 6.8 (5.7-7.9)                              |
| 20-34                | 3,669        | 15.9 (14.0-17.8)                           | 4,639                  | 15.8 (14.4-17.2)                           | 5,272                  | 15.5 (14.3-16.8)                           | 6,032        | 15.0 (13.8-16.2)                           | 5,638                  | 13.7 (12.4-15.0)                           |
| 35-49                | 4,043        | 18.2 (16.5-19.9)                           | 4,914                  | 16.6 (15.4-17.8)                           | 5,606                  | 16.3 (15.0-17.6)                           | 6,328        | 15.7 (14.6-16.8)                           | 5,928                  | 14.3 (13.0-15.6)                           |
| 50-64                | 3,701        | 16.8 (15.5-18.1)                           | 5,265                  | 18.0 (17.0-19.0)                           | 6,482                  | 18.1 (16.9-19.3)                           | 7,874        | 19.8 (18.5-21.1)                           | 8,797                  | 21.0 (19.4-22.6)                           |
| ≥65                  | 5,152        | 25.6 (21.1-30.0)                           | 7,956                  | 28.2 (24.7-31.7)                           | 10,160                 | 29.3 (25.8-32.7)                           | 11,845       | 30.5 (27.4-33.6)                           | 13,636                 | 34.5 (30.3-38.8)                           |
| <b>Total</b>         | 23,798       | 100.0                                      | 31,271                 | 100.0                                      | 37,088                 | 100.0                                      | 41,994       | 100.0                                      | 42,585                 | 100.0                                      |

<sup>a</sup> Data are from the National Electronic Injury Surveillance System–Cooperative Adverse Drug Event Surveillance project, US Centers for Disease Control and Prevention.

<sup>b</sup> Calculated from statistical weighting of cases based on the sample design.

<sup>c</sup> Patient age missing for one case.

**eTable 2. US Population Rates of Emergency Department (ED) Visits for Adverse Drug Events (ADEs) by Patient Age and Year, 2005-2014<sup>a</sup>**

| Patient age group, y | 2005-2006    |                                                               | 2007-2008 <sup>c</sup> |                                                               | 2009-2010 <sup>c</sup> |                                                               | 2011-2012    |                                                               | 2013-2014 <sup>c</sup> |                                                               |
|----------------------|--------------|---------------------------------------------------------------|------------------------|---------------------------------------------------------------|------------------------|---------------------------------------------------------------|--------------|---------------------------------------------------------------|------------------------|---------------------------------------------------------------|
|                      | No. of Cases | National Estimate Per 1,000 Individuals (95% CI) <sup>b</sup> | No. of Cases           | National Estimate Per 1,000 Individuals (95% CI) <sup>b</sup> | No. of Cases           | National Estimate Per 1,000 Individuals (95% CI) <sup>b</sup> | No. of Cases | National Estimate Per 1,000 Individuals (95% CI) <sup>b</sup> | No. of Cases           | National Estimate Per 1,000 Individuals (95% CI) <sup>b</sup> |
| <b>≤5</b>            | 4,581        | 4.6 (3.5-5.8)                                                 | 5,382                  | 5.0 (3.8-6.2)                                                 | 6,017                  | 5.7 (4.3-7.2)                                                 | 5,982        | 6.0 (4.6-7.4)                                                 | 5,133                  | 5.2 (3.9-6.4)                                                 |
| <b>6-19</b>          | 2,652        | 1.2 (0.9-1.4)                                                 | 3,114                  | 1.3 (1.0-1.6)                                                 | 3,550                  | 1.5 (1.1-1.8)                                                 | 3,993        | 1.8 (1.3-2.2)                                                 | 3,452                  | 1.5 (1.2-1.8)                                                 |
| <b>20-34</b>         | 3,669        | 2.0 (1.6-2.4)                                                 | 4,639                  | 2.4 (1.9-2.9)                                                 | 5,272                  | 2.7 (2.1-3.3)                                                 | 6,032        | 3.1 (2.4-3.8)                                                 | 5,638                  | 2.7 (2.1-3.2)                                                 |
| <b>35-49</b>         | 4,043        | 2.1 (1.6-2.5)                                                 | 4,914                  | 2.3 (1.9-2.8)                                                 | 5,606                  | 2.8 (2.2-3.4)                                                 | 6,328        | 3.3 (2.6-4.1)                                                 | 5,928                  | 3.0 (2.4-3.5)                                                 |
| <b>50-64</b>         | 3,701        | 2.5 (1.8-3.1)                                                 | 5,265                  | 3.0 (2.3-3.7)                                                 | 6,482                  | 3.4 (2.5-4.2)                                                 | 7,874        | 4.3 (3.2-5.4)                                                 | 8,797                  | 4.3 (3.3-5.3)                                                 |
| <b>≥65</b>           | 5,152        | 5.2 (3.2-7.2)                                                 | 7,956                  | 6.8 (4.7-8.9)                                                 | 10,160                 | 7.9 (5.5-10.4)                                                | 11,845       | 9.5 (6.8-12.2)                                                | 13,636                 | 9.7 (6.6-12.9)                                                |
| <b>Total</b>         | 23,798       | 2.6 (1.9-3.2)                                                 | 31,271                 | 3.0 (2.4-3.7)                                                 | 37,088                 | 3.5 (2.7-4.4)                                                 | 41,994       | 4.2 (3.2-5.2)                                                 | 42,585                 | 4.0 (3.1-5.0)                                                 |

<sup>a</sup> Data are from the National Electronic Injury Surveillance System—Cooperative Adverse Drug Event Surveillance project, US Centers for Disease Control and Prevention.

<sup>b</sup> Calculated from statistical weighting of cases based on the sample design.

<sup>c</sup> Patient age missing for one case.

**eTable 3. US Emergency Department (ED) Visits for Adverse Drug Events (ADEs) from Commonly Implicated Drug Classes by Year, 2005-2014<sup>a</sup>**

| Drug Class                      | 2005-2006       |                                            | 2007-2008       |                                            | 2009-2010       |                                            | 2011-2012       |                                            | 2013-2014       |                                            |
|---------------------------------|-----------------|--------------------------------------------|-----------------|--------------------------------------------|-----------------|--------------------------------------------|-----------------|--------------------------------------------|-----------------|--------------------------------------------|
|                                 | Number of Cases | National Estimate, % (95% CI) <sup>b</sup> | Number of Cases | National Estimate, % (95% CI) <sup>b</sup> | Number of Cases | National Estimate, % (95% CI) <sup>b</sup> | Number of Cases | National Estimate, % (95% CI) <sup>b</sup> | Number of Cases | National Estimate, % (95% CI) <sup>b</sup> |
| <b>Antibiotics</b>              | 4,618           | 19.2 (17.7-20.7)                           | 5,752           | 18.6 (16.8-20.4)                           | 6,769           | 18.6 (16.7-20.6)                           | 7,486           | 17.9 (16.6-19.3)                           | 6,426           | 16.1 (14.4-17.8)                           |
| <b>Anticoagulants</b>           | 1,576           | 7.3 (4.6-9.9)                              | 3,086           | 9.9 (7.6-12.2)                             | 4,224           | 11.2 (8.2-14.1)                            | 5,237           | 13.3 (11.1-15.4)                           | 7,211           | 17.6 (14.2-21.0)                           |
| <b>Antineoplastic agents</b>    | 575             | 1.8 (0.8-2.8)                              | 650             | 1.6 (0.8-2.4)                              | 1,172           | 2.5 (1.2-3.9)                              | 1,437           | 2.4 (1.3-3.4)                              | 2,007           | 3.0 (1.6-4.3)                              |
| <b>Antiplatelets</b>            | 736             | 3.7 (2.1-5.2)                              | 1,389           | 4.6 (2.7-6.5)                              | 1,744           | 4.6 (2.9-6.2)                              | 1,858           | 4.8 (3.2-6.4)                              | 2,656           | 6.6 (4.7-8.5)                              |
| <b>Antipsychotics</b>           | 720             | 2.8 (2.2-3.4)                              | 983             | 3.0 (2.5-3.5)                              | 1,156           | 3.0 (2.6-3.4)                              | 1,396           | 3.1 (2.5-3.7)                              | 1,281           | 2.7 (2.1-3.2)                              |
| <b>Diabetes agents</b>          | 2,522           | 10.9 (7.3-14.5)                            | 3,855           | 12.8 (9.1-16.6)                            | 4,572           | 12.0 (9.1-14.9)                            | 5,007           | 12.0 (9.1-14.8)                            | 5,995           | 13.3 (10.8-15.8)                           |
| <b>NSAIDs</b>                   | 996             | 4.1 (3.4-4.8)                              | 1,053           | 3.5 (3.0-3.9)                              | 1,133           | 3.2 (2.8-3.6)                              | 1,341           | 3.2 (2.7-3.7)                              | 1,199           | 2.8 (2.4-3.2)                              |
| <b>Opioid analgesics</b>        | 1,781           | 7.7 (6.9-8.6)                              | 2,288           | 7.9 (7.1-8.8)                              | 2,535           | 7.2 (6.6-7.8)                              | 3,090           | 7.9 (7.2-8.5)                              | 2,714           | 6.8 (6.3-7.4)                              |
| <b>RAS inhibitors</b>           | 559             | 2.4 (1.9-2.9)                              | 769             | 2.5 (1.9-3.0)                              | 1,074           | 2.9 (2.2-3.7)                              | 1,443           | 3.2 (2.4-4.0)                              | 1,578           | 3.5 (2.6-4.4)                              |
| <b>Sedative/hypnotic agents</b> | 780             | 3.2 (2.7-3.7)                              | 1,015           | 3.2 (2.8-3.6)                              | 1,266           | 3.6 (3.1-4.2)                              | 1,414           | 3.4 (2.8-3.9)                              | 1,218           | 3.0 (2.4-3.5)                              |

<sup>a</sup> Data are from the National Electronic Injury Surveillance System–Cooperative Adverse Drug Event Surveillance project, US Centers for Disease Control and Prevention. Data exclude ED visits for abuse or self-harm. NSAIDs = Non-steroidal anti-inflammatory drugs. RAS = Renin-angiotensin system.

<sup>b</sup> Calculated from statistical weighting of cases based on the sample design.

**eFigure. US Emergency Department (ED) Visits for Adverse Drug Events (ADEs) from Commonly Implicated Drug Classes by Patient Age, 2013-2014<sup>a</sup>**

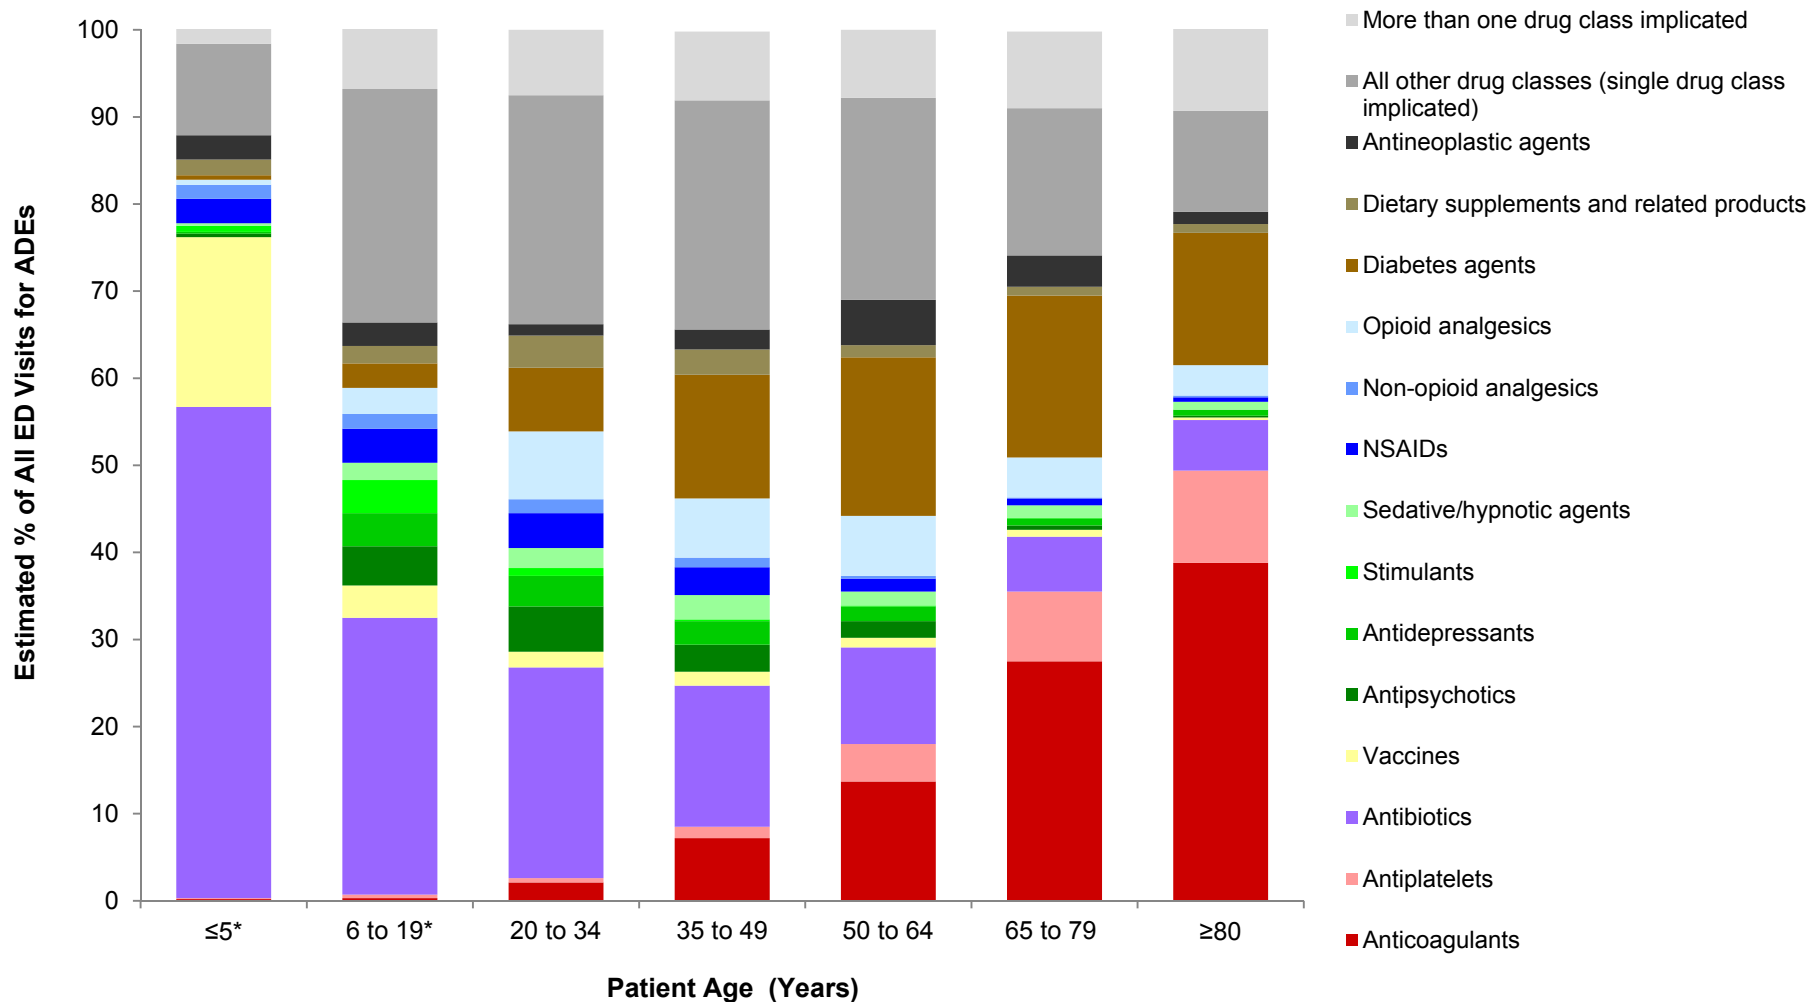

<sup>a</sup> Data are from the National Electronic Injury Surveillance System–Cooperative Adverse Drug Event Surveillance project, US Centers for Disease Control and Prevention. Data exclude ED visits for abuse or self-harm. Data for specific drug classes represent only ED visits in which a single drug class was implicated. National estimates are calculated from statistical weighting of cases based on the sample design. Small estimates for some age groups may not be statistically reliable (eg, percentage of ED visits in which anticoagulants were implicated among patients ≤5 years of age). Refer to Table 4 for data in tabular form (including confidence intervals). NSAIDs = Non-steroidal anti-inflammatory drugs.

\* Excludes ED visits for unsupervised medication ingestions by children aged 10 years or younger.
